# Supplementary material
Source: MDPI journal article supplement (https://www.mdpi.com/2072-4292/13/18/3764)
Supplement: s1 [file s1]

# Modeling the Near-Surface Energies and Water Vapor Fluxes Behavior in Response to Summer Canopy Density across Yanqi Endorheic Basin, Northwestern China

Patient Mindje Kayumba <sup>1,2,3</sup>, Gonghuan Fang <sup>1,2,\*</sup>, Yaning Chen <sup>1,2,\*</sup>, Richard Mind'je <sup>1,2,3</sup>, Yanan Hu <sup>1,2</sup>, Sikandar Ali <sup>1,2</sup> and Mapendo Mindje <sup>4</sup>

<sup>1</sup> State Key Laboratory of Desert and Oasis Ecology, Xinjiang Institute of Ecology and Geography, Chinese Academy of Sciences, 818 South Beijing Road, Urumqi 830011, Xinjiang, China; patientestime001@mails.ucas.ac.cn (P.M.K.); chenyn@ms.xjb.ac.cn (Y.C.); mindjerichard@mails.ucas.ac.cn (R.M.); huyan19@mails.ucas.ac.cn (Y.H.); alisikandar26@mails.ucas.ac.cn (S.A.)

<sup>2</sup> University of Chinese Academy of Sciences, Beijing 100049, China

<sup>3</sup> Faculty of Environmental Sciences, University of Lay Adventists of Kigali (UNILAK), Kigali 6392, Rwanda

<sup>4</sup> Center of Excellence in Biodiversity and Natural Resource Management, University of Rwanda, College of Agriculture, Animal Sciences and Veterinary Medicine, Huye 117, Rwanda; m.mapendo@ur.ac.rw (M.M.)

Correspondence: [fanggh@ms.xjb.ac.cn](mailto:fanggh@ms.xjb.ac.cn) ; [chenyn@ms.xjb.ac.cn](mailto:chenyn@ms.xjb.ac.cn)

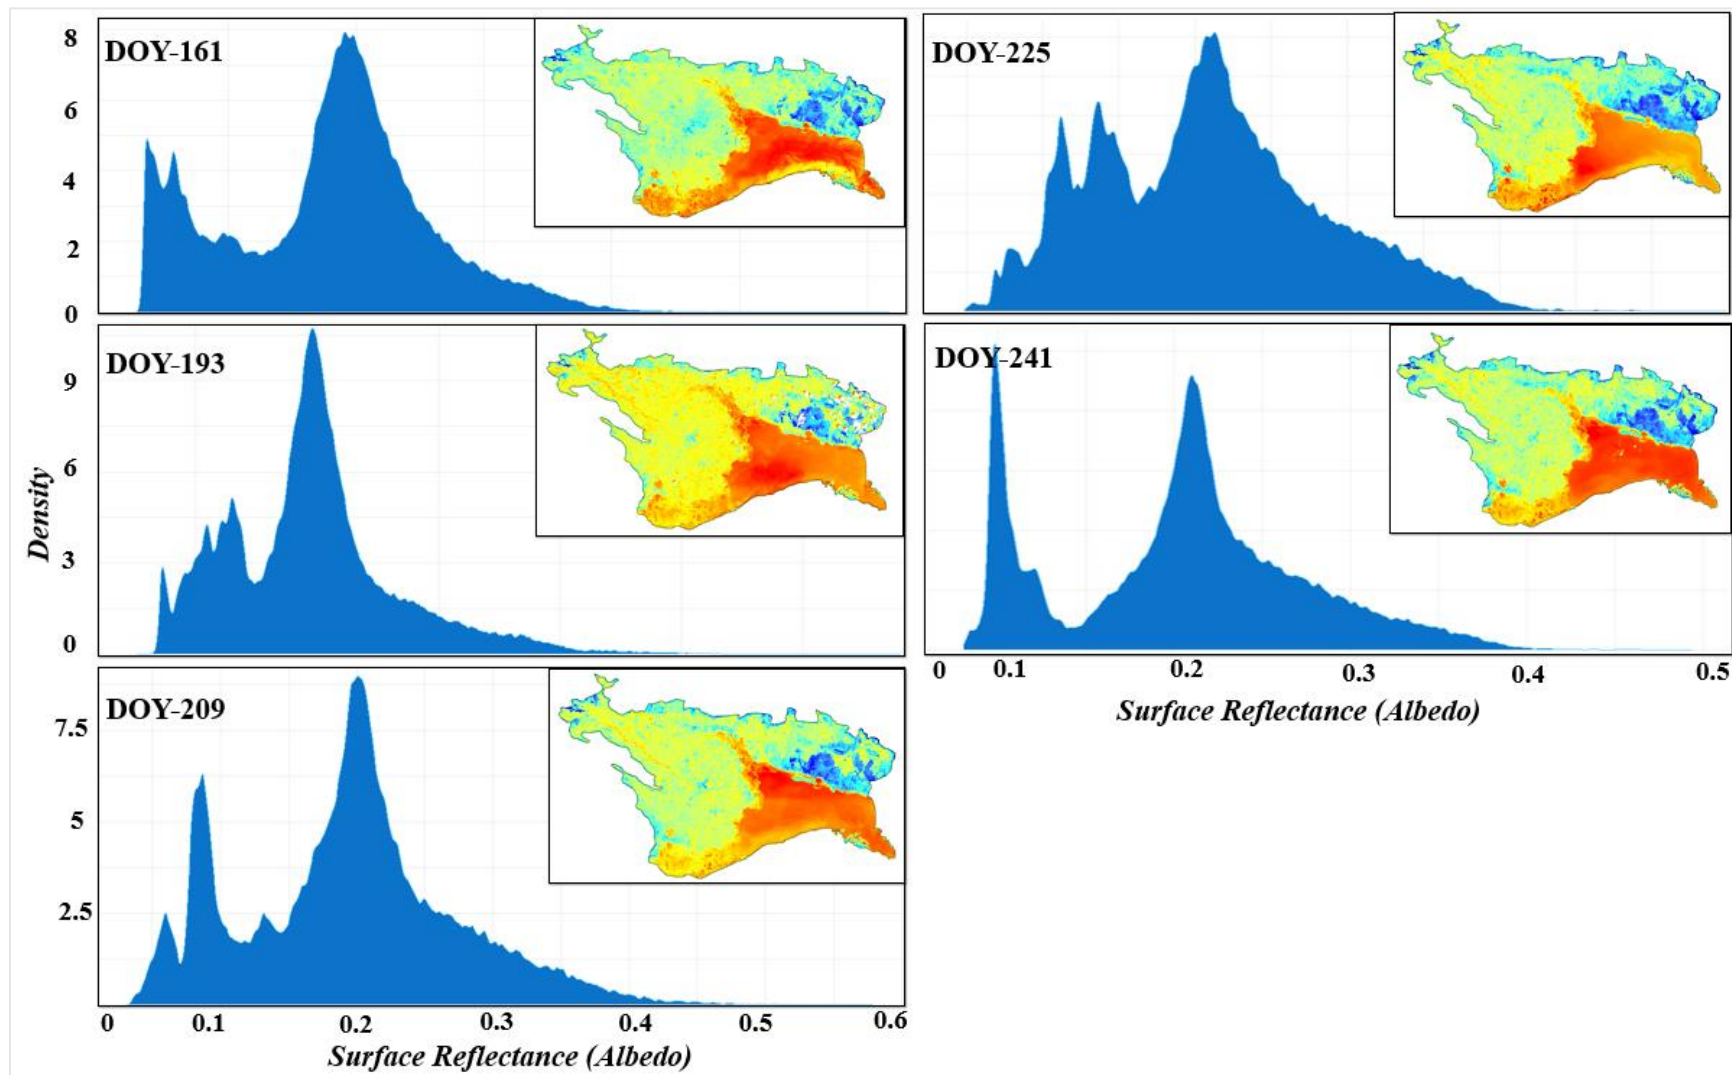

**Figure S1.** Spatial distribution of surface reflectance across Yanqi Basin under the study period.

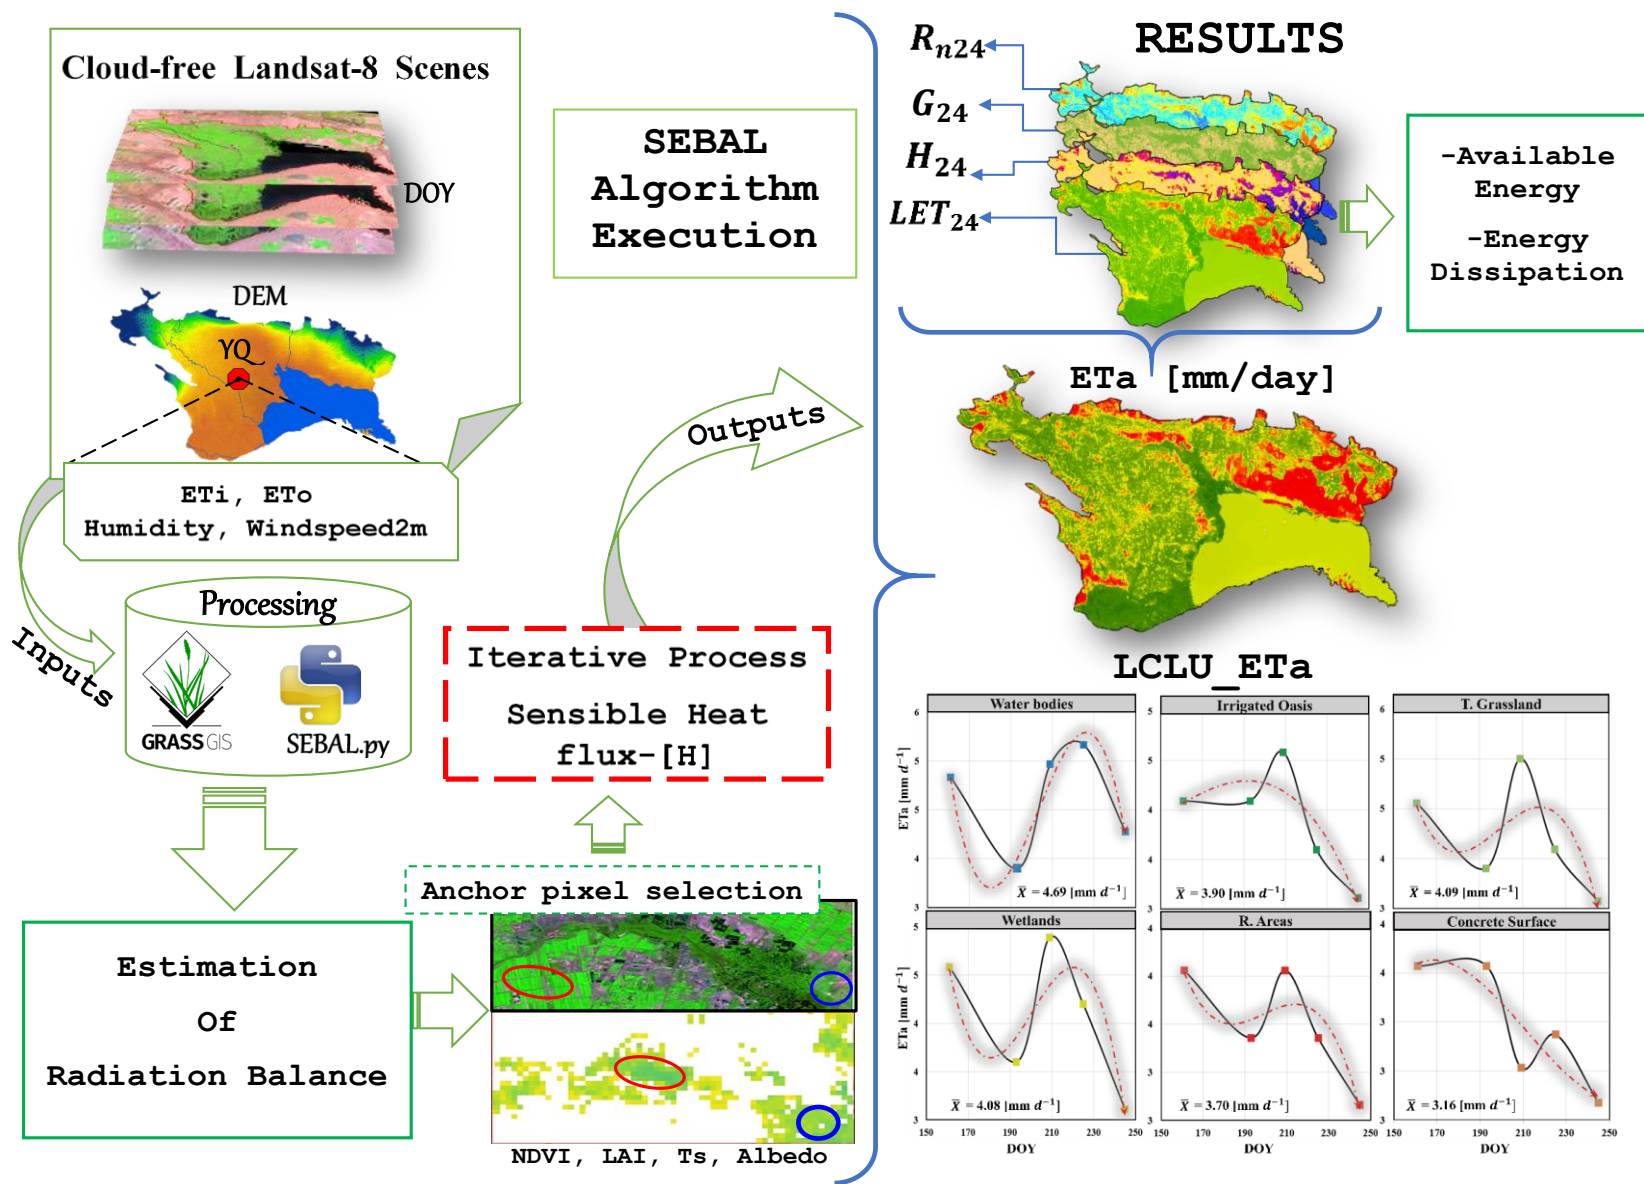

Figure S2. Graphical flowchart of the study (SEBAL model execution)
